# Supplementary material
Source: PubMed Central journal article supplement (PMC2169500)
Supplement: NIHMS35880-supplement-supplement.pdf [file NIHMS35880-supplement-supplement.pdf]

Supplemental Figure A

*THP-1* macrophages (*D*-serum)

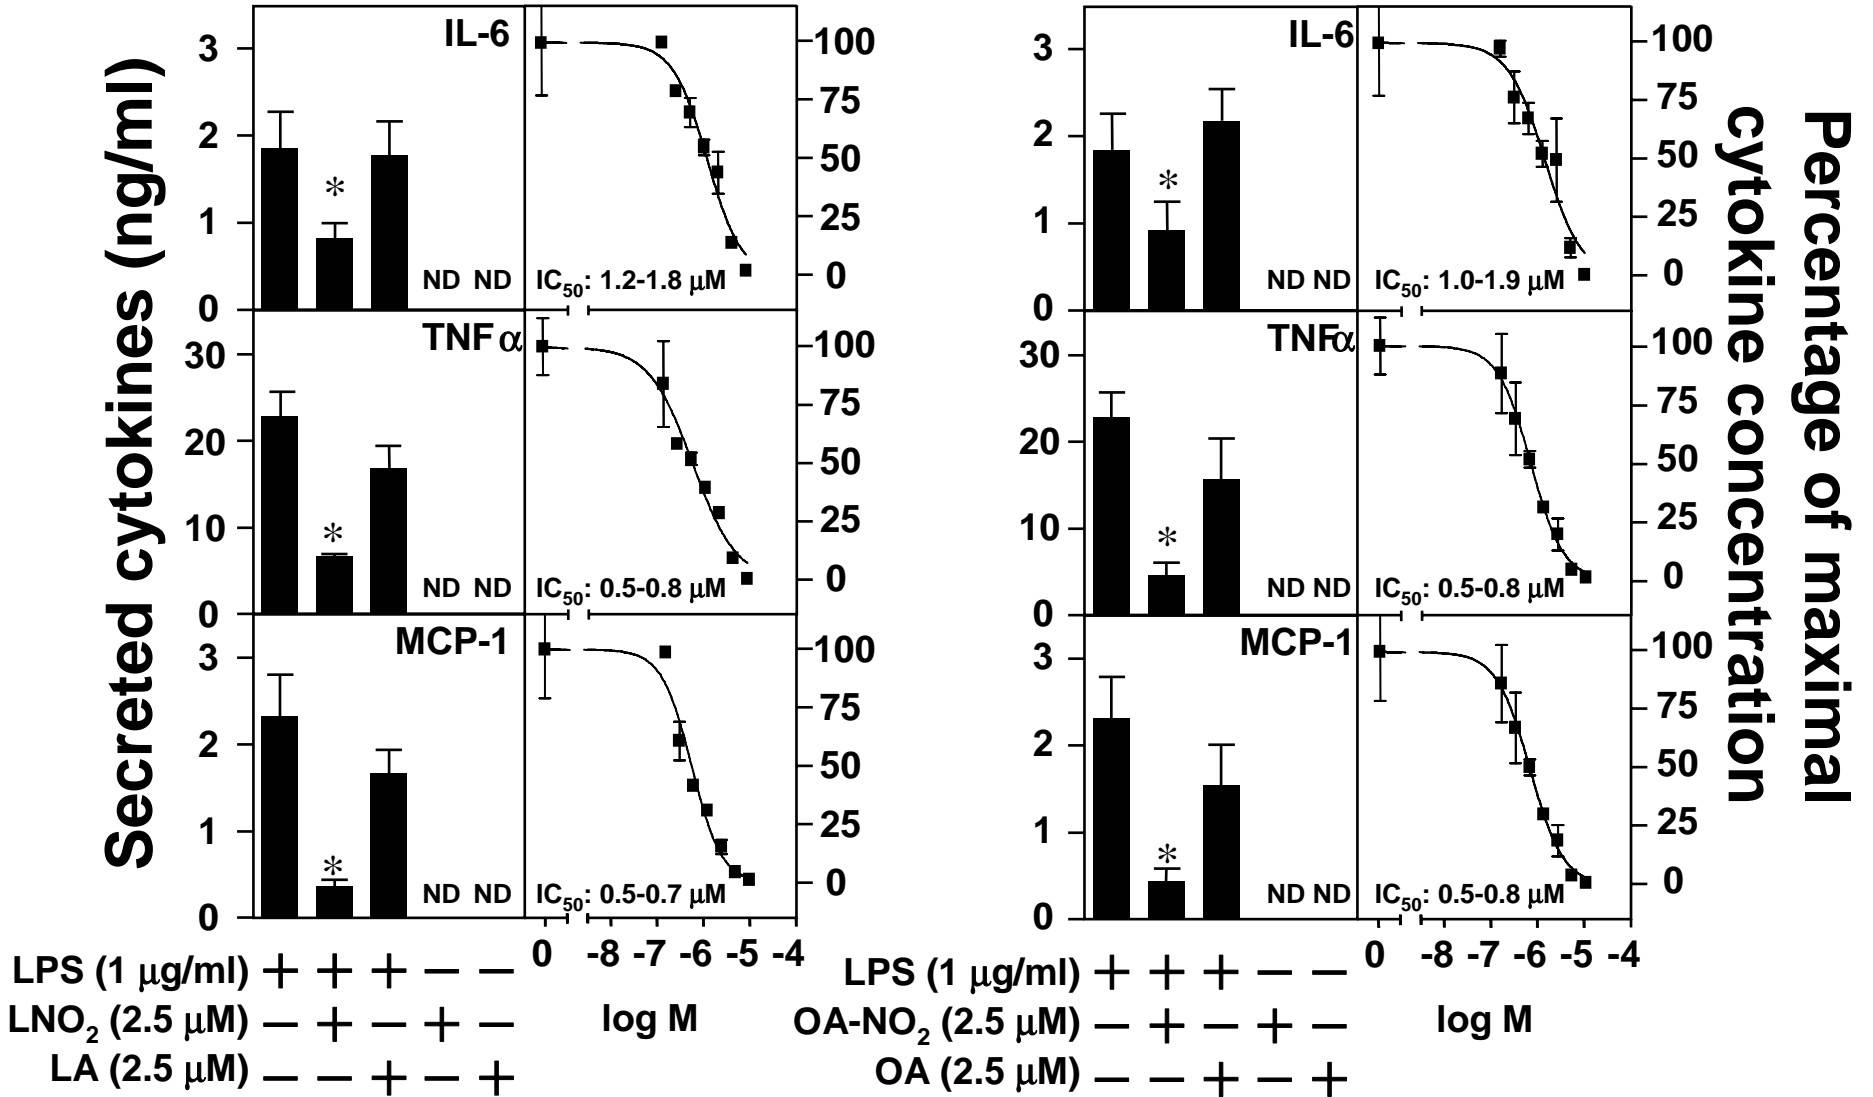

Supplemental Figure B

*RAW264.7* macrophages (*D*-serum)

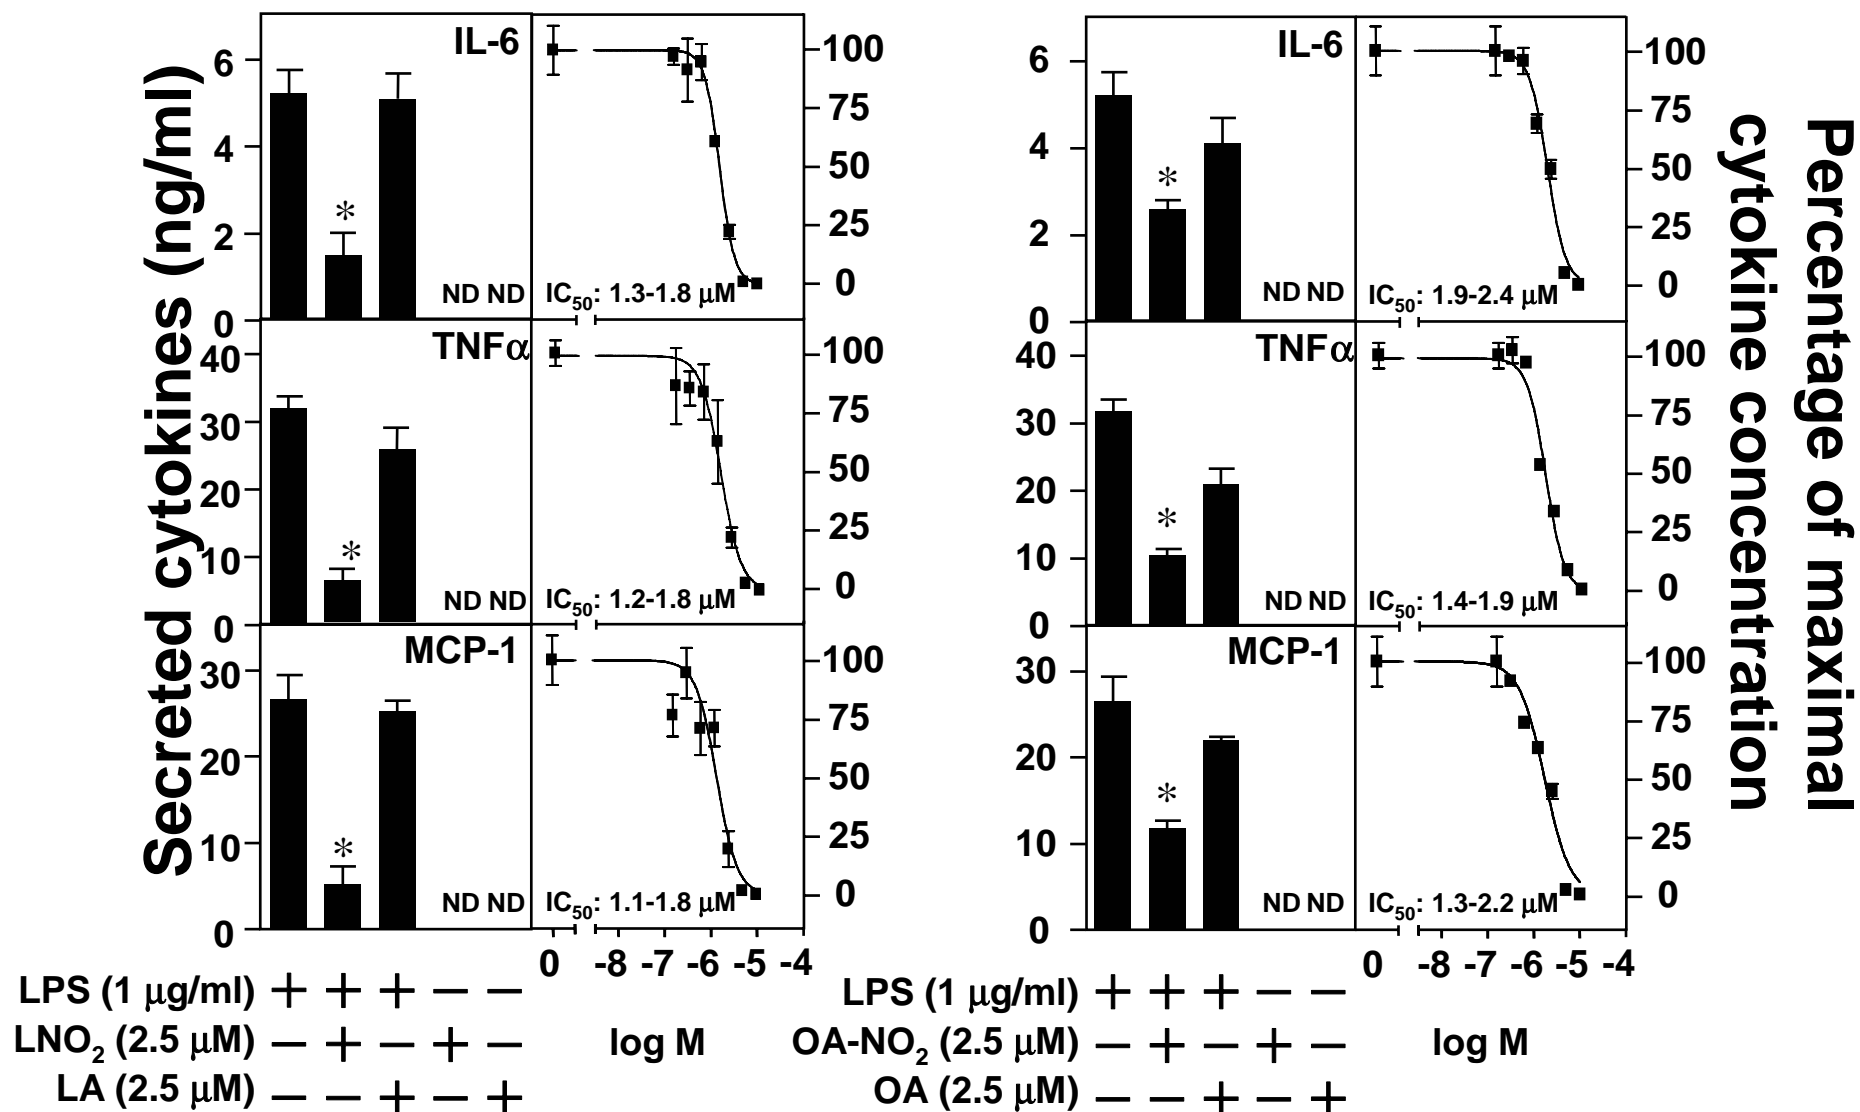

**Legend to supplemental figure.**

**LNO<sub>2</sub> and OA-NO<sub>2</sub> inhibited LPS-induced inflammatory cytokine secretion in THP-1 and RAW264.7 macrophages in delipidated serum.** *A, B*, Cells were stimulated as indicated for overnight in fresh culture medium with 1% delipidated serum (D-serum). The secretion of pro-inflammatory cytokines was assessed by ELISA. Values are expressed as mean  $\pm$  s.d. (n=6). \* p<0.05 vs LPS alone. ND, non-detectable; LNO<sub>2</sub>, nitrated linoleic acid; OA-NO<sub>2</sub>, nitrated oleic acid; LA, linoleic acid; OA, oleic acid.

## Supplemental Table I

### PCR reaction conditions and primer sequences for QRTPCR<sup>a</sup>

| Gene <sup>b</sup>  | Ta <sup>b</sup> | Tm <sup>c</sup> | Extension time | Primer sequence                                                         |
|--------------------|-----------------|-----------------|----------------|-------------------------------------------------------------------------|
| PPAR $\alpha$      | 56°C            | 61°C            | 14 s           | Up; 5'-acaaggcaaggcccgggtcact-3'<br>Low; 5'-atcagcatcccgtctttgtcatca-3' |
| PPAR $\delta$      | 56°C            | 61°C            | 20 s           | Up; 5'-tcaacatggaatgtcgggtgt-3'<br>Low; 5'-ggaggactggcagcggtag-3'       |
| PPAR $\gamma$ 1    | 56°C            | 61°C            | 16 s           | Up; 5'-aagattgaaagaagcgggtga-3'<br>Low; 5'-caatggccatgagggagttag-3'     |
| PPAR $\gamma$ 2    | 56°C            | 61°C            | 16 s           | Up; 5'-ttcgtgatgcactgcctatg-3'<br>Low; 5'-gatccggcagttaagatcaca-3'      |
| GAPDH <sup>d</sup> | 62°C            | 95°C            | 18 s           | Up; 5'-accacagtccatgccatcac-3'<br>Low; 5'-tccaccacctgctgta-3'           |

*a:* A previous denaturing step at melting temperature was performed for 30 s; melting plateau time was 0 s; reactions were run for a total of 35 to 45 cycles.

*b:* Ta, annealing temperature.

*c:* Tm, melting temperature.

*d:* Housekeeping gene for normalization

## Adhesion and rolling of THP-1 monocytes cell on HUVEC in laminar flow:

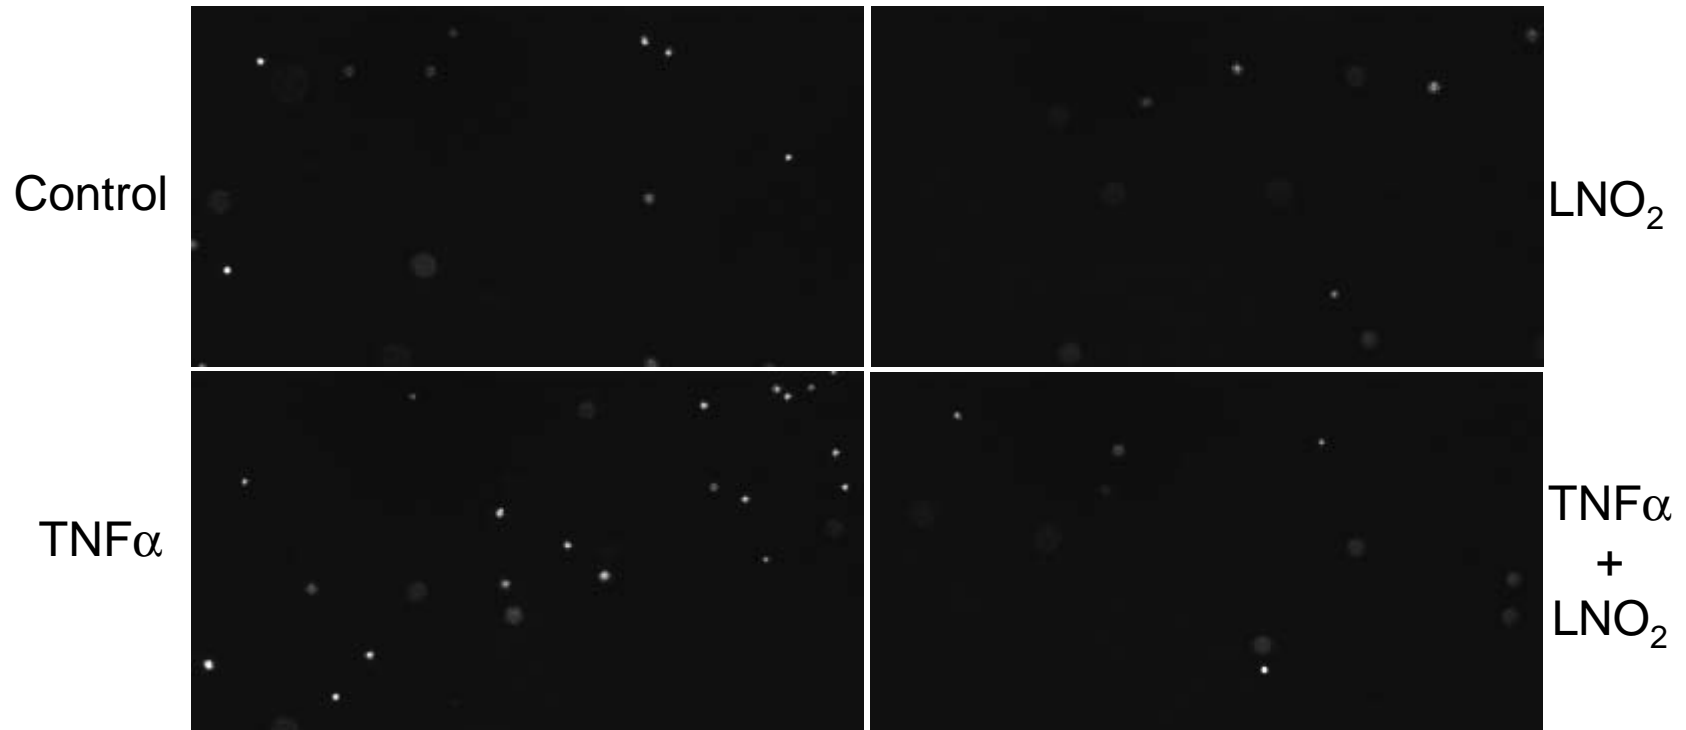

Shear Stress : 0.5dyn/cm<sup>2</sup>

**Movie 1: Adhesion and rolling of THP-1 monocytes cell on HUVEC in laminar flow:** Fluorescently labeled THP-1 cell adhesion to and rolling on HUVEC during a flow rate corresponding to a wall shear rate of 0.5 dynes/cm<sup>2</sup> was captured at 30 frames/sec for 10 sec using the Automated Image Capture (AIC) feature of Simple PCI software (Compix Inc, Cranberry Township, PA). Conditions include untreated HUVECs, LNO<sub>2</sub> pretreated (10  $\mu$ M, 2 hours) and or activated for 16 h with TNF $\alpha$  (2 ng/ml). A Glycotech flow chamber system (Rockville, Md) was used and THP-1 cells were viewed on a Leica inverted fluorescence microscope equipped with differential interference contrast optics and a Hamamatsu Orca ER digital CCD camera (Compix Inc, Cranberry Township, PA).
